# Supplementary material
Source: publisher site journal article supplement (https://www.dovepress.com/article/515434)
Supplement: Supplementary file 1 [file 515434%20Revised%20Supplementary%20material.pdf]

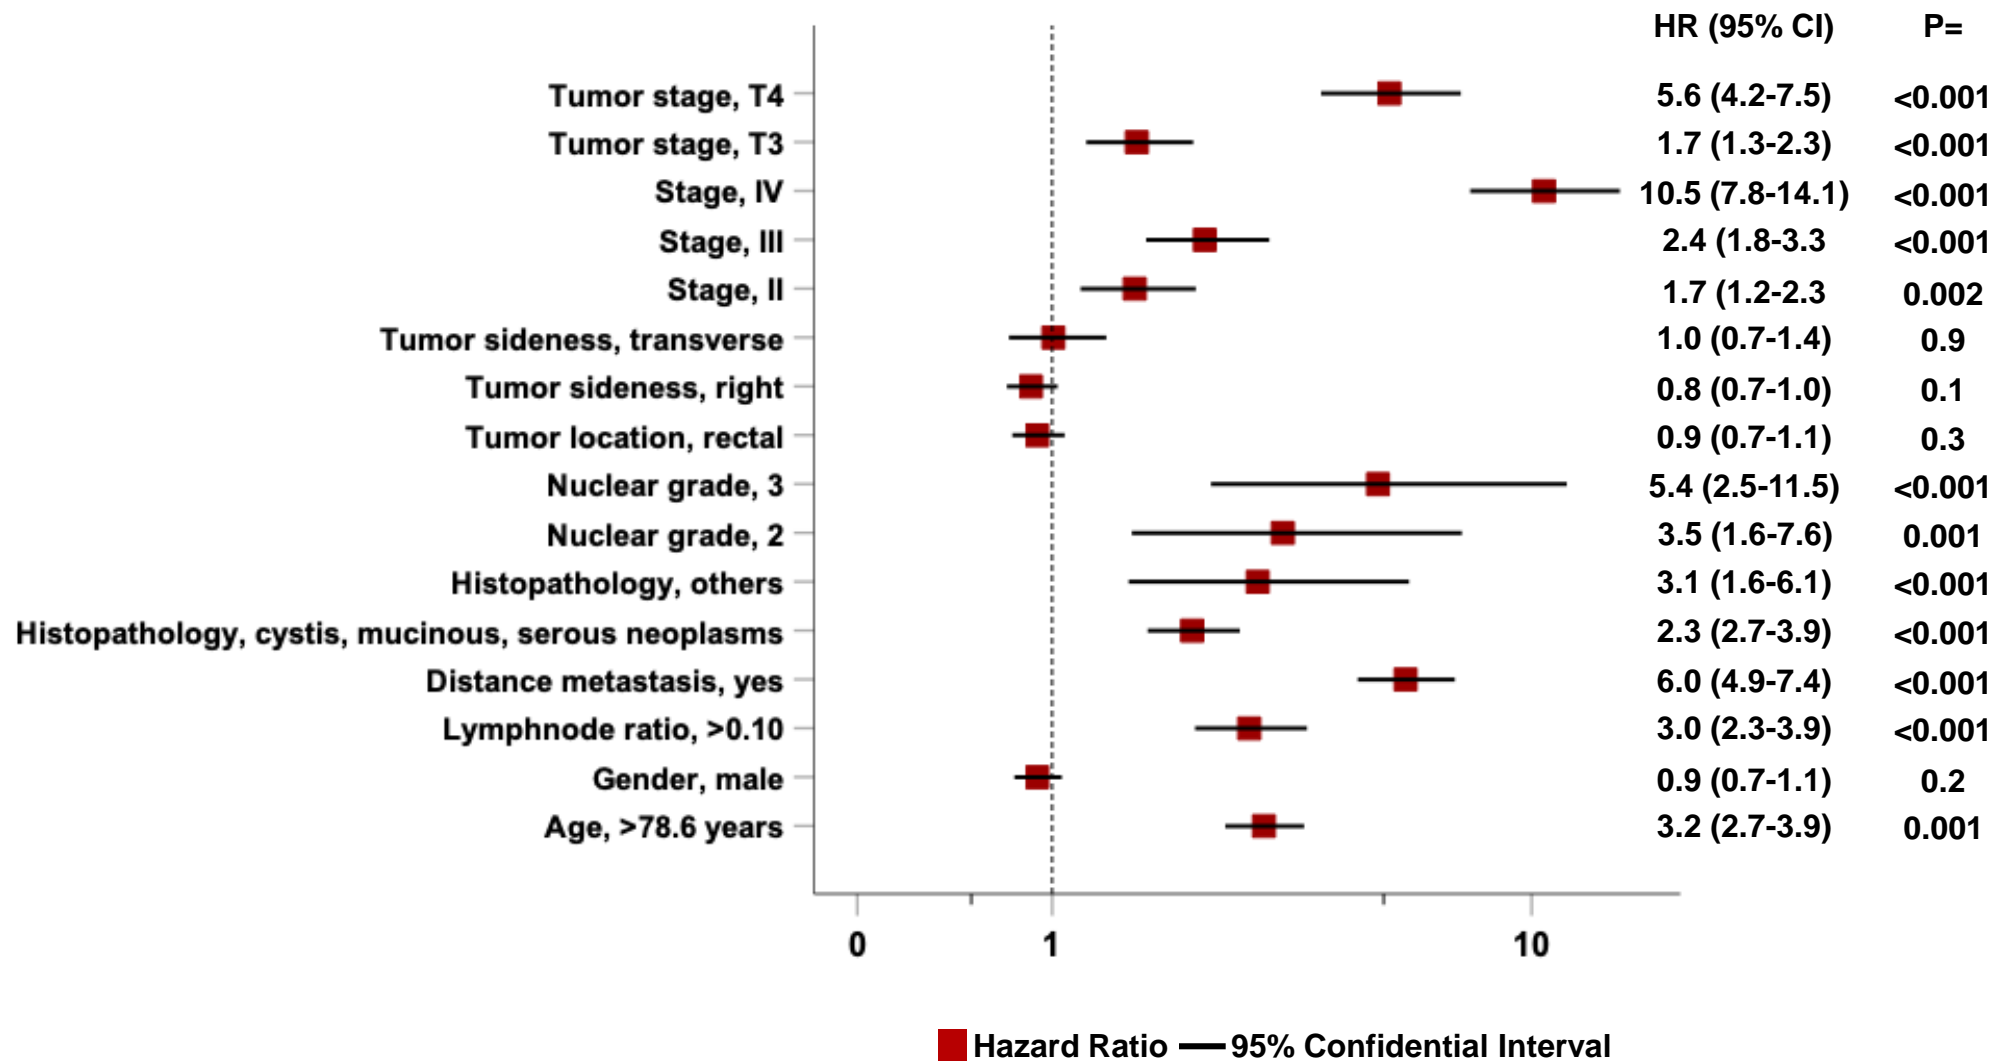

**Supplementary Figure 1.** Forest plot of Cox univariate analysis for overall survival (training cohort) by potential prognostic variables.

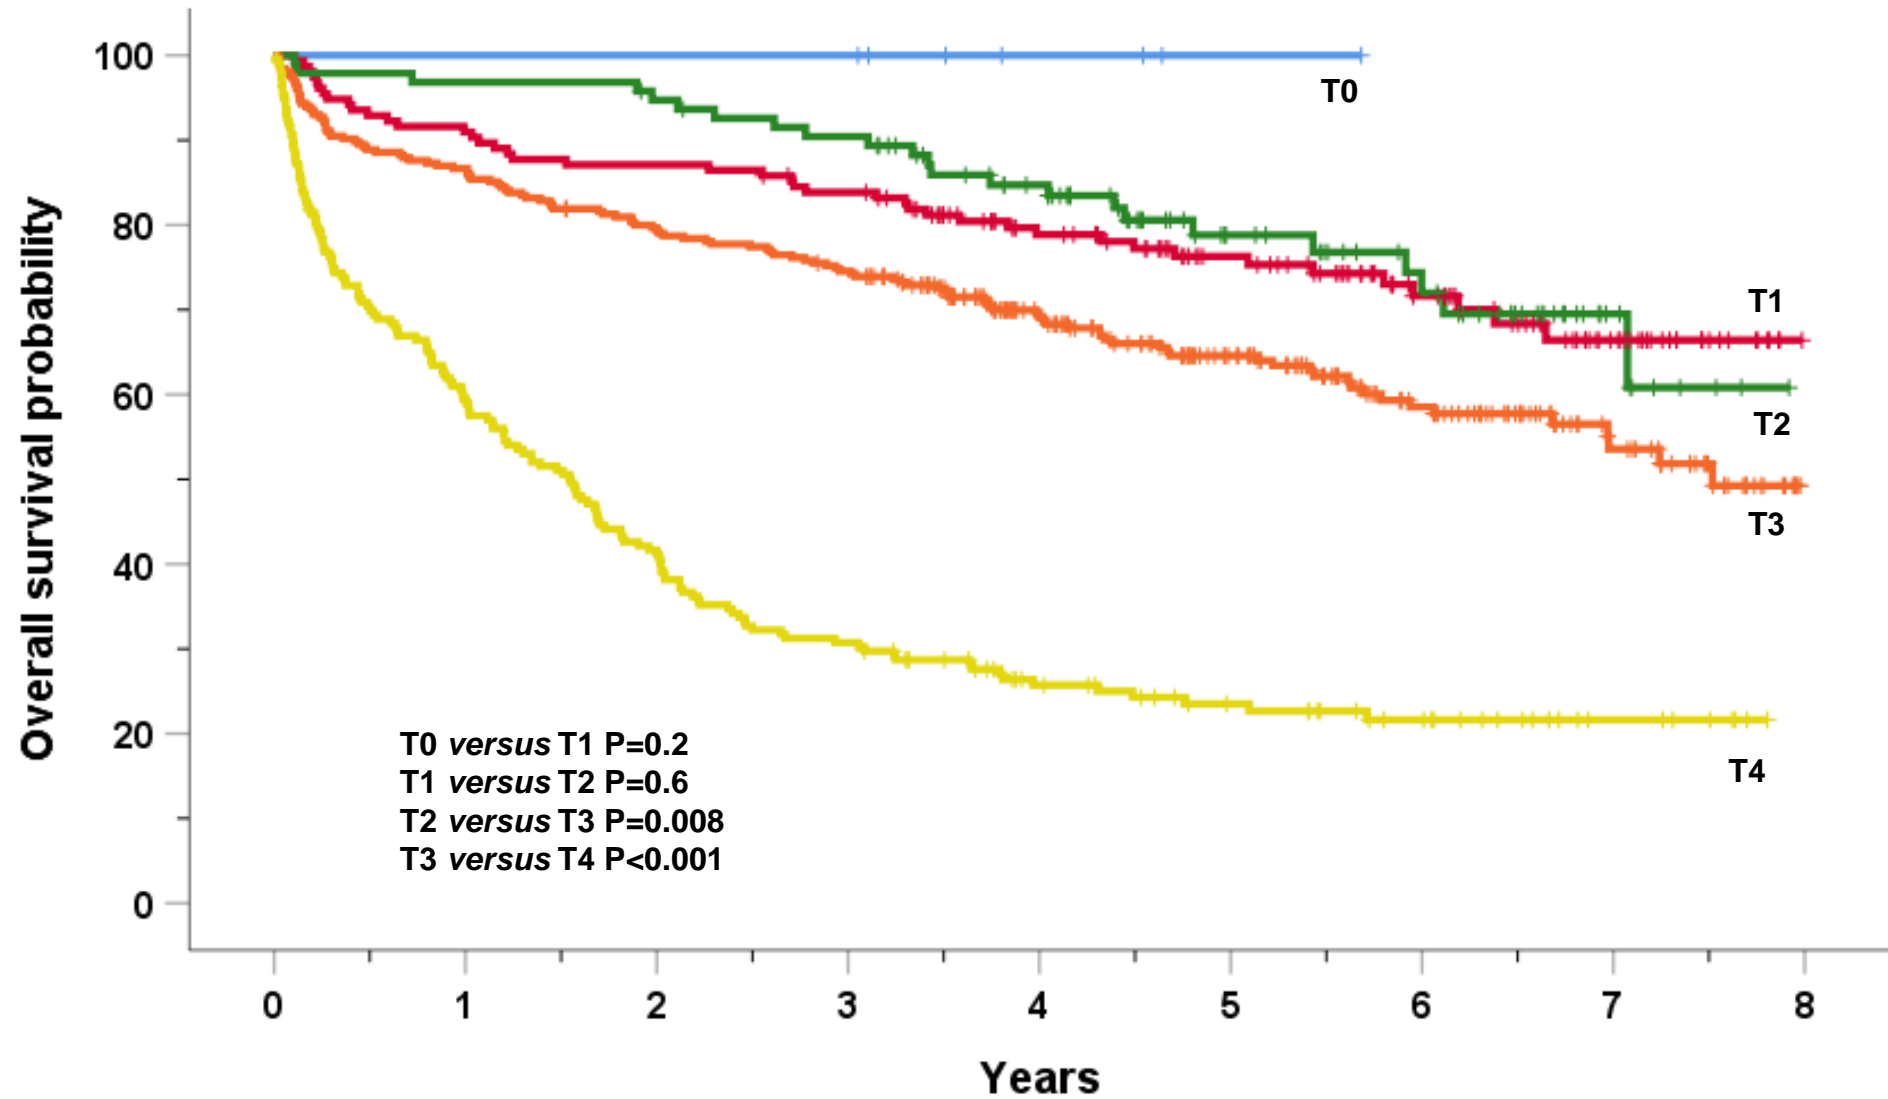

| No. at risk | 0   | 1   | 2   | 3   | 4   | 5   | 6  | 7  | 8 |
|-------------|-----|-----|-----|-----|-----|-----|----|----|---|
| T0          | 7   | 7   | 7   | 7   | 2   | -   |    |    |   |
| T1          | 155 | 141 | 135 | 128 | 100 | 78  | 51 | 25 | - |
| T2          | 95  | 92  | 89  | 84  | 68  | 41  | 30 | 9  | - |
| T3          | 315 | 273 | 248 | 232 | 164 | 119 | 74 | 36 | - |
| T4          | 203 | 120 | 83  | 62  | 39  | 28  | 19 | 7  | - |

**Supplementary Figure 2.** Kaplan-Maier curve of overall survival of the training cohort of 775 colorectal cancer by size and extend of the primary tumor (T).

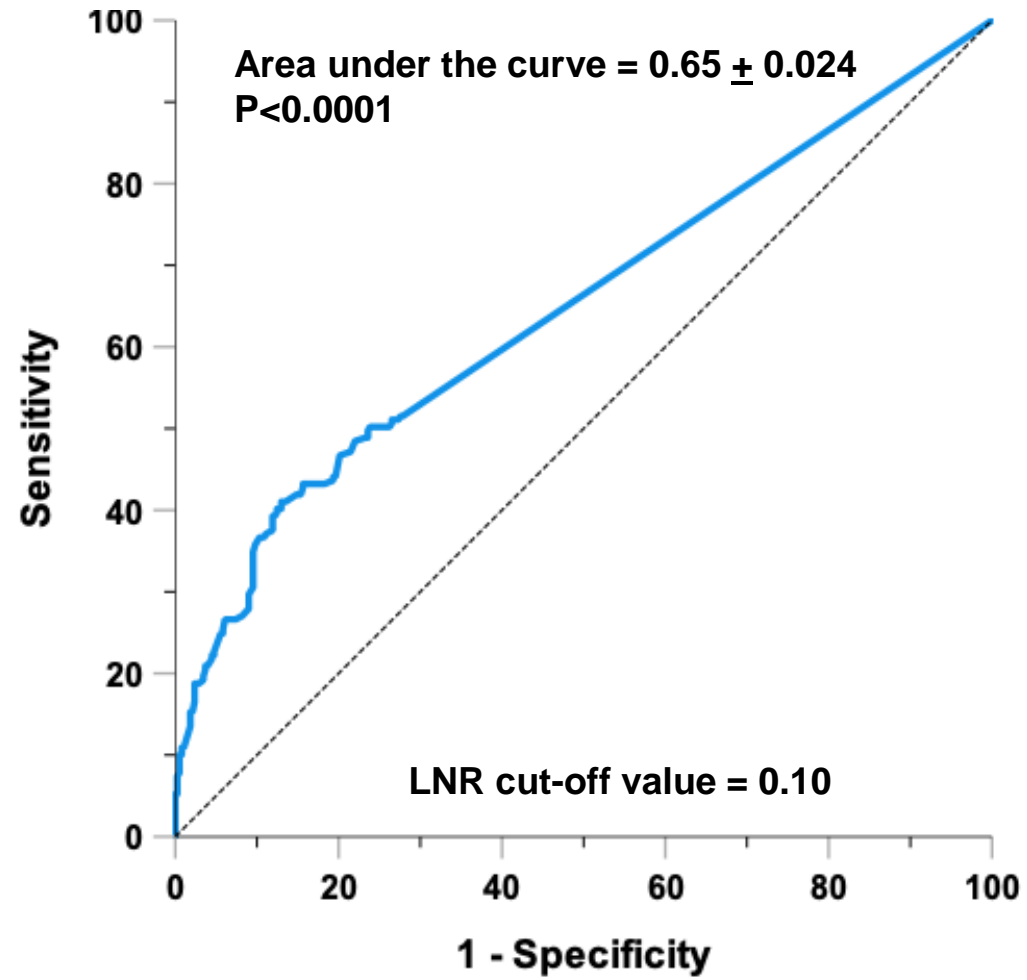

**Supplementary Figure 3.** Receiver Operating Characteristic (ROC) analysis of LNR to identify patients who died. The dashed line represents the reference line of prognostic usefulness.

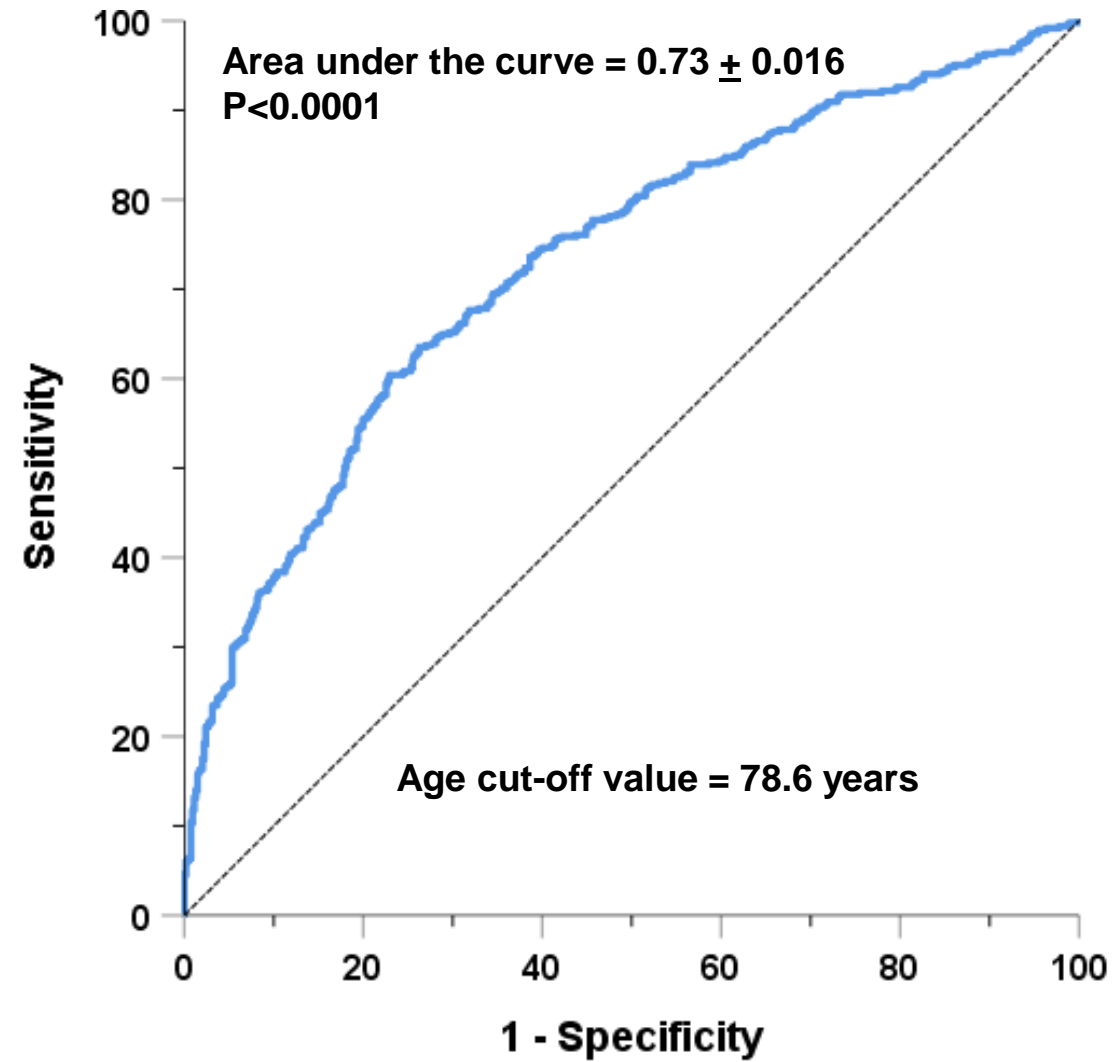

**Supplementary Figure 4.** Receiver Operating Characteristic (ROC) analysis of age to identify patients who died. The dashed line represents the reference line of prognostic usefulness.

**Supplementary Table 1.** Regression coefficients (b), percentage weights (%), and the lymph node ratio (LNR)-derived overall survival risk score calculation resulting from the 4-factor multivariable model. This analysis was carried out in 573 colorectal cancer cases, in which all the variables were available

| Variables                 | Regression coefficients (b) | Score calculation     | Risk scores (%)       |
|---------------------------|-----------------------------|-----------------------|-----------------------|
| <b>Tumor stage</b>        |                             |                       | <u>T0-T2</u> = 0      |
| <b>T4</b>                 | 1.331                       | $1.331/6.333 = 0.210$ | T3 = 0<br>T4 = 21.0   |
| <b>LNR</b>                |                             |                       | <u>LNR</u> ≤ 0.10 = 0 |
| <b>≥ 0.10</b>             | 0.823                       | $0.823/6.332 = 0.130$ | LNR > 0.10 = 13.0     |
| <b>Distant metastasis</b> |                             |                       | <u>M0</u> = 0         |
| <b>M1</b>                 | 2.909                       | $2.909/6.332 = 0.459$ | M1 = 45.9             |
| <b>Age</b>                |                             |                       | < 78.6 years = 0      |
| <b>≥ 78.6 years</b>       | 1.269                       | $1.269/6.332 = 0.20$  | ≥ 78.6 years = 20.0   |
|                           | Total = 6.332               |                       |                       |
